# Supplementary material
Source: PubMed Central journal article supplement (PMC6675020)
Supplement: NIHMS1011121-supplement-1.pdf [file NIHMS1011121-supplement-1.pdf]

| Table E1: Comparison of Entry Criteria for Three Trials involving Preschool Children                                                                                                                             |                                                                                                                                                                                                                                                                                                                                                                                                                                        |                                                                                                                                                                                                                |                                                                                                                                                                                                                                                                                                                                                                              |
|------------------------------------------------------------------------------------------------------------------------------------------------------------------------------------------------------------------|----------------------------------------------------------------------------------------------------------------------------------------------------------------------------------------------------------------------------------------------------------------------------------------------------------------------------------------------------------------------------------------------------------------------------------------|----------------------------------------------------------------------------------------------------------------------------------------------------------------------------------------------------------------|------------------------------------------------------------------------------------------------------------------------------------------------------------------------------------------------------------------------------------------------------------------------------------------------------------------------------------------------------------------------------|
|                                                                                                                                                                                                                  | INFANT                                                                                                                                                                                                                                                                                                                                                                                                                                 | PEAK                                                                                                                                                                                                           | MIST                                                                                                                                                                                                                                                                                                                                                                         |
| <b>Years conducted</b>                                                                                                                                                                                           | 2013-2015                                                                                                                                                                                                                                                                                                                                                                                                                              | 2001-2005                                                                                                                                                                                                      | 2008-2010                                                                                                                                                                                                                                                                                                                                                                    |
| <b>Number of primary sites</b>                                                                                                                                                                                   | 9                                                                                                                                                                                                                                                                                                                                                                                                                                      | 5                                                                                                                                                                                                              | 7                                                                                                                                                                                                                                                                                                                                                                            |
| <b>Network conducted</b>                                                                                                                                                                                         | AsthmaNet                                                                                                                                                                                                                                                                                                                                                                                                                              | CARE Network                                                                                                                                                                                                   | CARE Network                                                                                                                                                                                                                                                                                                                                                                 |
| <b>Source of funding</b>                                                                                                                                                                                         | NHLBI                                                                                                                                                                                                                                                                                                                                                                                                                                  | NHLBI                                                                                                                                                                                                          | NHLBI                                                                                                                                                                                                                                                                                                                                                                        |
| <b>Ages enrolled</b>                                                                                                                                                                                             | 12-59 months                                                                                                                                                                                                                                                                                                                                                                                                                           | 24-48 months                                                                                                                                                                                                   | 12-53 months                                                                                                                                                                                                                                                                                                                                                                 |
| <b>Symptom criteria for inclusion</b>                                                                                                                                                                            | <p>NHLBI guideline-based criteria for daily asthma (step-2) controller medication</p> <p>(Symptom criteria: daytime asthma <math>\geq 2</math> days/week; nighttime awakening in the last month, <math>\geq 2</math> exacerbations in the past 6 months, <math>\geq 4</math> wheezing episodes over the past 12 months. <i>Can be included if additionally on ICS or LTRA for <math>\geq 90</math> days in the last 6 months</i>).</p> | <p>Meets the modified asthma predictive index</p> <p>(<math>\geq 4</math> wheezing episodes during the past 12 months. <i>At least one exacerbation was confirmed by a physician per parental report</i>).</p> | <p>Meets the modified asthma predictive index</p> <p>(<math>\geq 4</math> wheezing episodes during the past 12 months or 3 wheezing episodes and controller use for <math>\geq 3</math> months. <i>At least one exacerbation was confirmed by a physician per parental report</i>)</p> <p>Severe exacerbation requiring systemic glucocorticoids or higher level of care</p> |
| <b>Exclusions</b>                                                                                                                                                                                                |                                                                                                                                                                                                                                                                                                                                                                                                                                        |                                                                                                                                                                                                                |                                                                                                                                                                                                                                                                                                                                                                              |
| Life-threatening asthma                                                                                                                                                                                          | Yes                                                                                                                                                                                                                                                                                                                                                                                                                                    | Yes                                                                                                                                                                                                            | Yes                                                                                                                                                                                                                                                                                                                                                                          |
| Other chronic lung disease                                                                                                                                                                                       | Yes                                                                                                                                                                                                                                                                                                                                                                                                                                    | Yes                                                                                                                                                                                                            | Yes                                                                                                                                                                                                                                                                                                                                                                          |
| Gastroesophageal Reflux                                                                                                                                                                                          | Yes                                                                                                                                                                                                                                                                                                                                                                                                                                    | Yes                                                                                                                                                                                                            | Yes                                                                                                                                                                                                                                                                                                                                                                          |
| Prematurity                                                                                                                                                                                                      | Yes                                                                                                                                                                                                                                                                                                                                                                                                                                    | Yes                                                                                                                                                                                                            | Yes                                                                                                                                                                                                                                                                                                                                                                          |
| Other chronic disease                                                                                                                                                                                            | Yes                                                                                                                                                                                                                                                                                                                                                                                                                                    | Yes                                                                                                                                                                                                            | Yes                                                                                                                                                                                                                                                                                                                                                                          |
| Recent steroids                                                                                                                                                                                                  | Yes                                                                                                                                                                                                                                                                                                                                                                                                                                    | Yes                                                                                                                                                                                                            | Yes                                                                                                                                                                                                                                                                                                                                                                          |
| Recent hospitalizations                                                                                                                                                                                          | Yes                                                                                                                                                                                                                                                                                                                                                                                                                                    | No                                                                                                                                                                                                             | Yes                                                                                                                                                                                                                                                                                                                                                                          |
| Medication exclusions                                                                                                                                                                                            | Cannot be higher than step 2 NAEPP asthma guideline therapy                                                                                                                                                                                                                                                                                                                                                                            | Cannot have used ICS $\geq 4$ months in the past year                                                                                                                                                          | N/A                                                                                                                                                                                                                                                                                                                                                                          |
| <b>Intervention duration</b>                                                                                                                                                                                     | 16 weeks per cross-over                                                                                                                                                                                                                                                                                                                                                                                                                | 2 years                                                                                                                                                                                                        | 1 year                                                                                                                                                                                                                                                                                                                                                                       |
| <b>Intervention products</b>                                                                                                                                                                                     | <p>Crossover of:</p> <p>Flovent<sup>®</sup> HFA, 44 mcg per inhalation, 2 inhalations twice daily, and Singulair<sup>®</sup>, 4 mg granules or chewable tablets by mouth once daily in the evening, and Flovent<sup>®</sup> HFA, 44 mcg per inhalation, 2 inhalations with as needed SABA for asthma symptoms</p>                                                                                                                      | <p>Flovent<sup>®</sup> HFA, 44 mcg per inhalation, 2 inhalations twice daily</p> <p>vs</p> <p>Placebo</p>                                                                                                      | <p>Pulmicort Respules<sup>®</sup>, 0.5 mg, 1 nebulization daily</p> <p>vs</p> <p>Pulmicort Respules<sup>®</sup>, 1 mg, 1 nebulization BID x 7 days with upper respiratory tract infection.</p>                                                                                                                                                                               |
| CARE – Childhood Asthma Research & Education, NHLBI – National Heart Lung and Blood Institute, NAEPP – National Asthma Education & Prevention Program, HFA – hydrofluoroalkane, SABA – short acting beta-agonist |                                                                                                                                                                                                                                                                                                                                                                                                                                        |                                                                                                                                                                                                                |                                                                                                                                                                                                                                                                                                                                                                              |
